# Supplementary material
Source: Research Square preprint supplement (doi:10.21203/rs.3.rs-9784441/v1)
Supplement: Supplementary file 1 [file 41e170c8e4f845924cb46c40.docx]

**Supplemental Table 1**

| **Glyvance™** | **ADA** |
| --- | --- |
| **Breakfast** | |
| 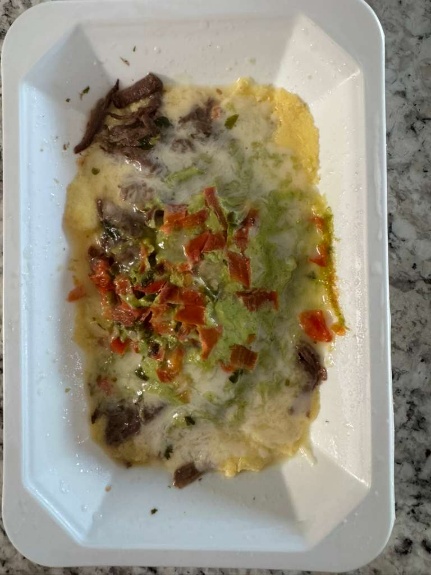  Eggs with Pico de Gallo Sauce | 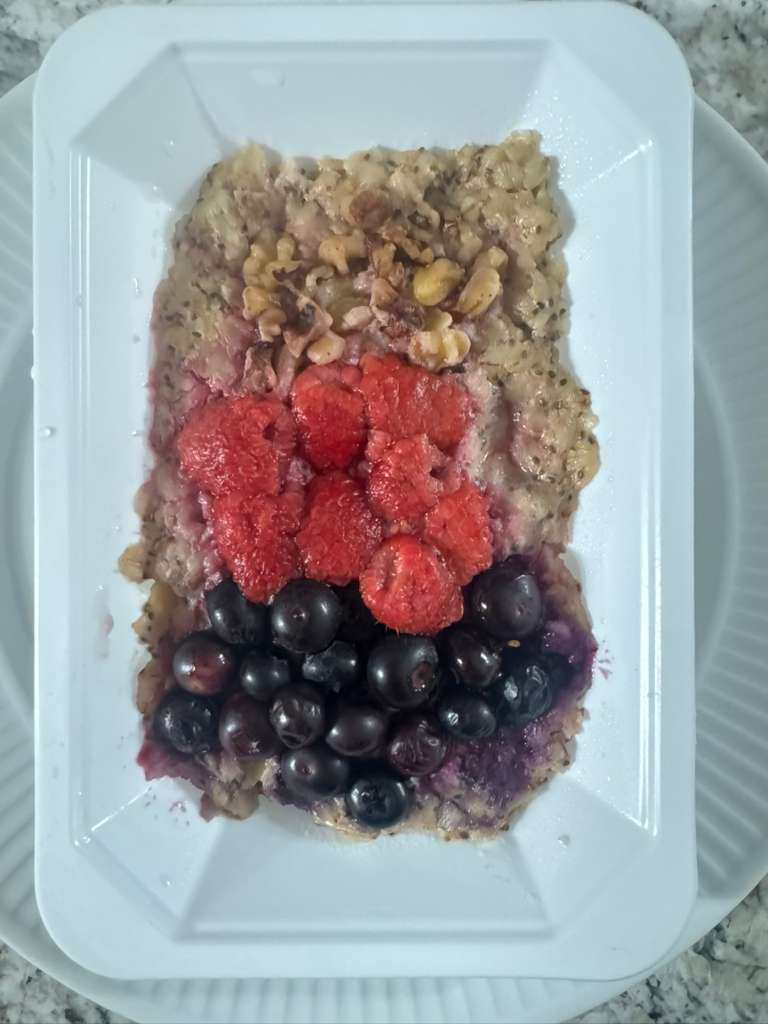  Oatmeal and Berries |
| **Lunch** | |
| 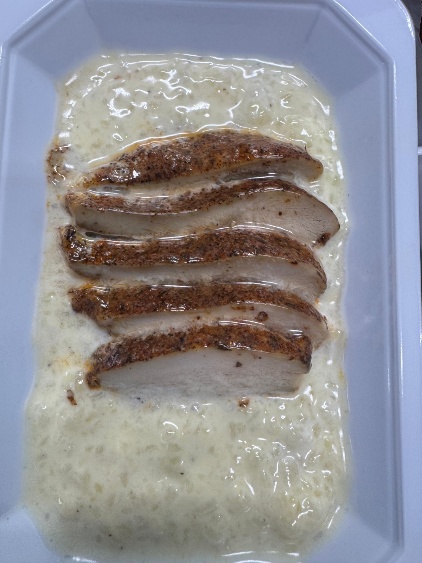  Chicken Alfredo with Cauliflower Risotto | 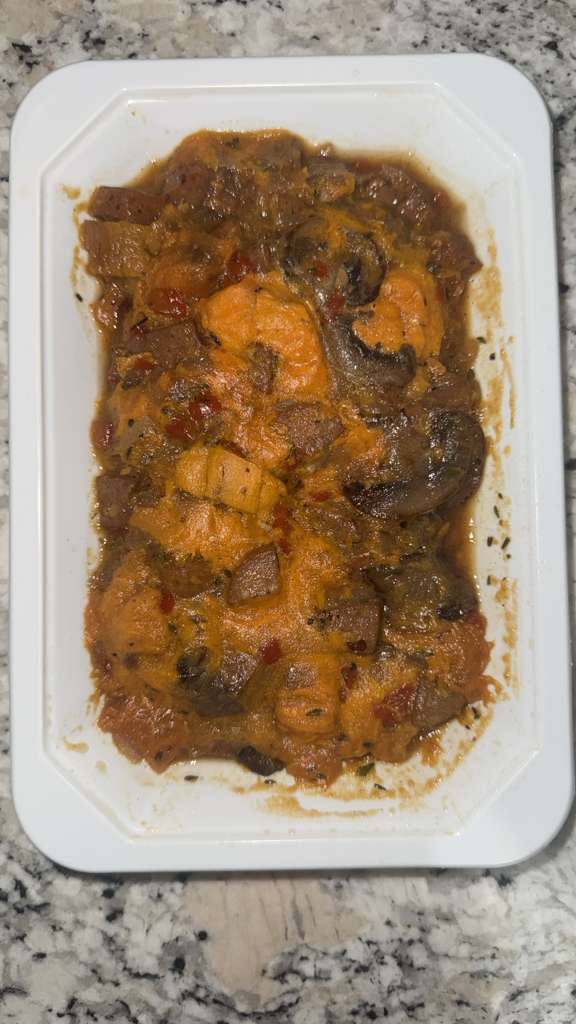  Chicken Sausage Hash |
| **Dinner** | |
| 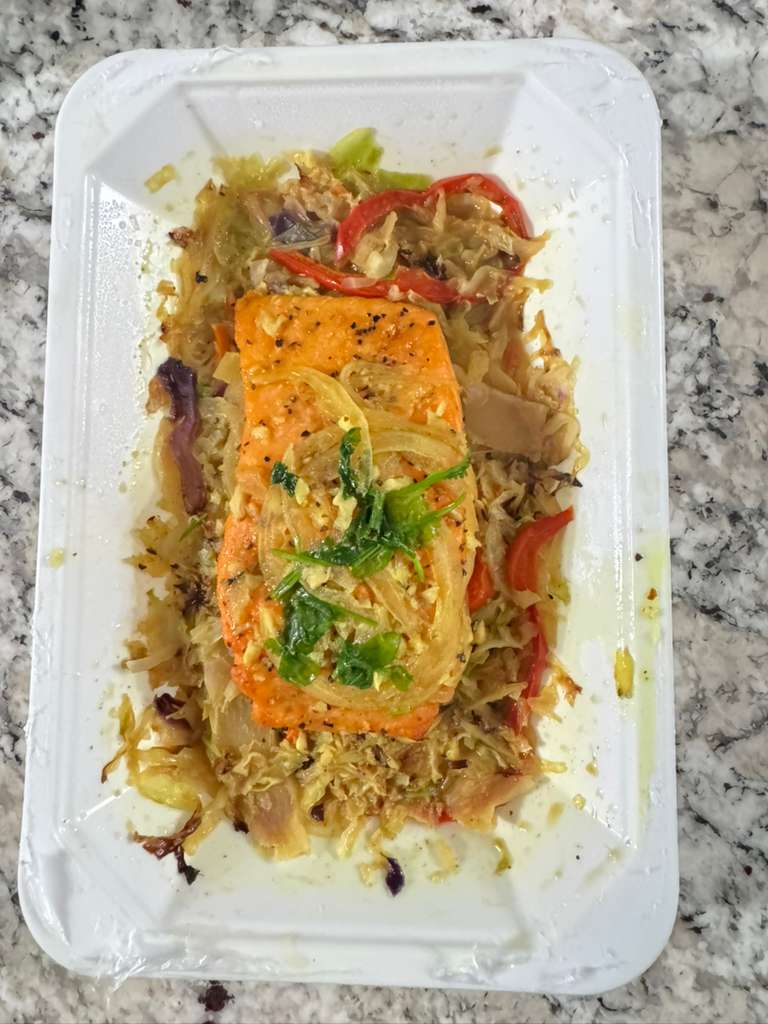  Mediterranean Style Salmon | 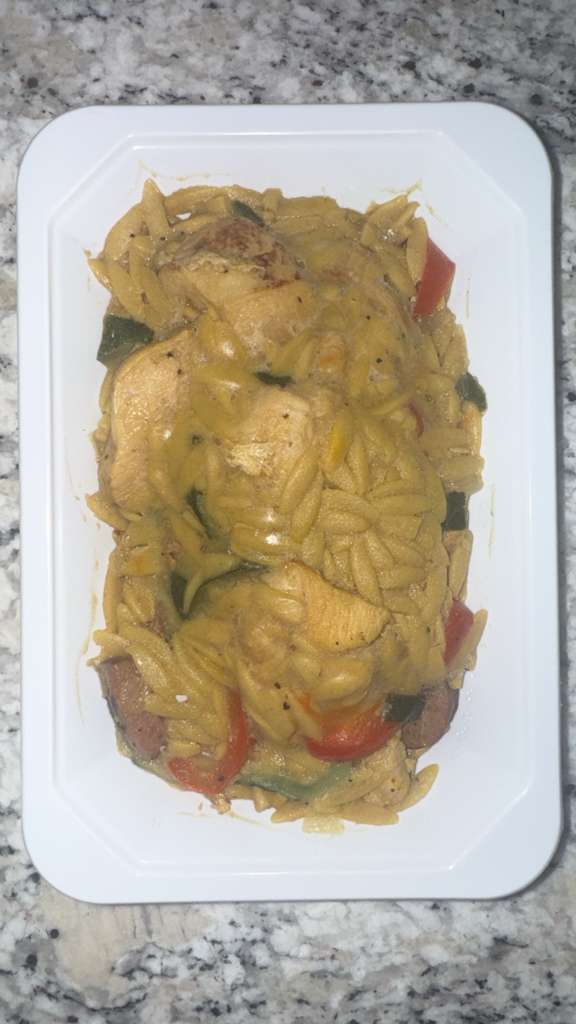  Chicken and Pepper Paella |


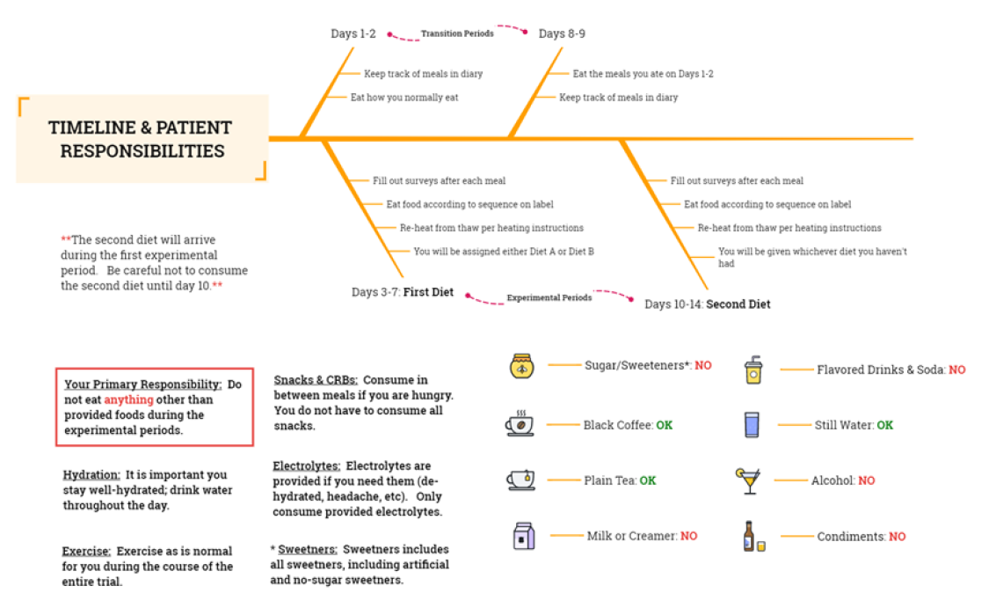


**Supplemental Figure 1**


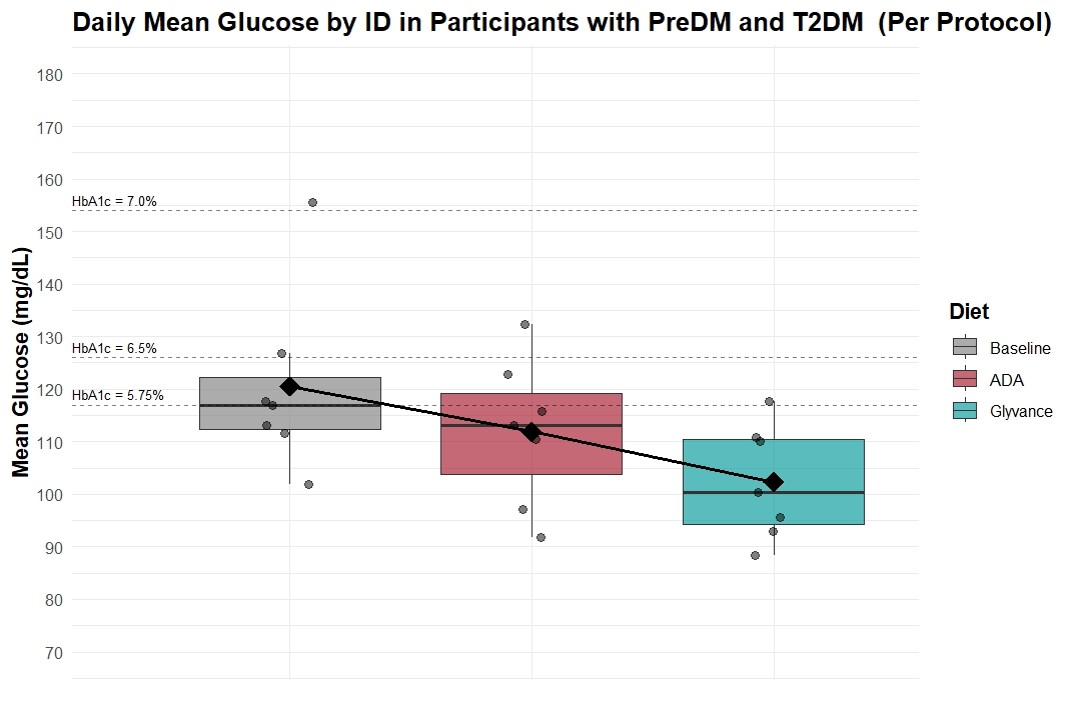


**Supplemental Figure 2A**


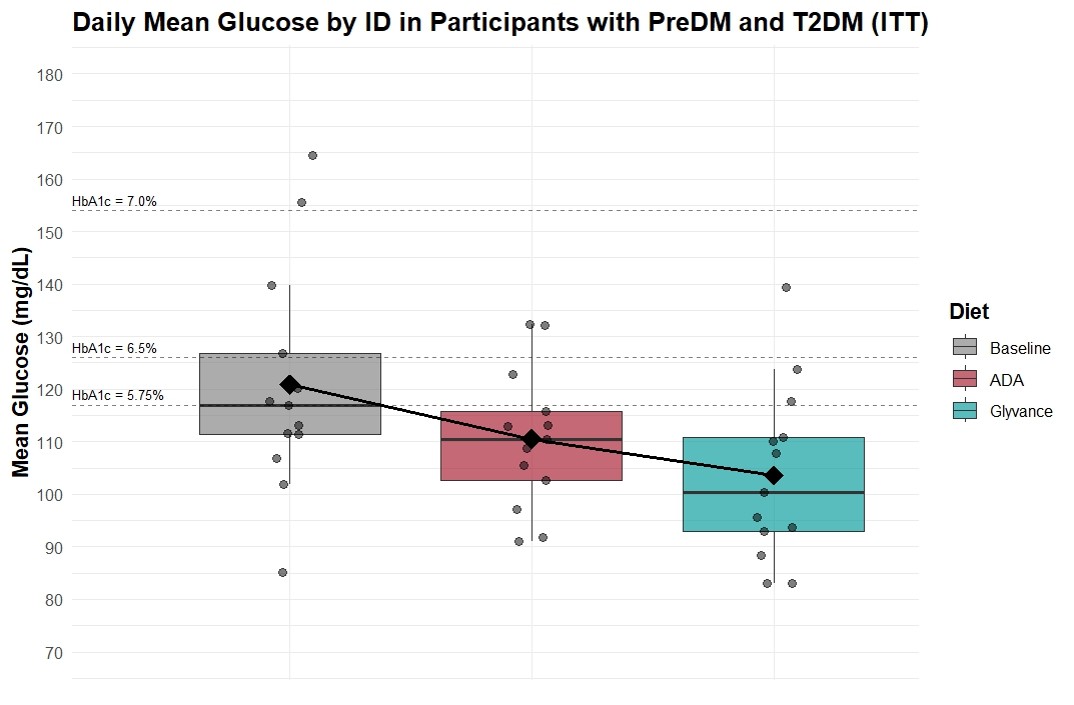


**Supplemental Figure 2B**
